# Supplementary material
Source: HighWire-hosted journal article supplement (https://erj.ersjournals.com/highwire/filestream/132065/field_highwire_adjunct_files/0/ERJ-00749-2016_supplement.pdf)
Supplement: ERJ-00749-2016_supplement.pdf [file ERJ-00749-2016_supplement.pdf]

**Supplementary file:**

**Surveillance region of birth classification\*, Public Health England Enhanced TB Surveillance (London, 2013)**

The UN classification <http://unstats.un.org/unsd/methods/m49/m49regin.htm> was amended to take into account the epidemiology of TB in some regions, the pattern of migration in west Europe and some political or historical grouping

|                                                                                                                                                                                                                                                                                                                                                                                                                     |                                                                                                                                                                                                                                                                 |                                                                                                                                                                                                                                                |                                                                                                                                     |                                                                                                                                                                                                                                                                                                                                                                                                                                                                                                                                                    |
|---------------------------------------------------------------------------------------------------------------------------------------------------------------------------------------------------------------------------------------------------------------------------------------------------------------------------------------------------------------------------------------------------------------------|-----------------------------------------------------------------------------------------------------------------------------------------------------------------------------------------------------------------------------------------------------------------|------------------------------------------------------------------------------------------------------------------------------------------------------------------------------------------------------------------------------------------------|-------------------------------------------------------------------------------------------------------------------------------------|----------------------------------------------------------------------------------------------------------------------------------------------------------------------------------------------------------------------------------------------------------------------------------------------------------------------------------------------------------------------------------------------------------------------------------------------------------------------------------------------------------------------------------------------------|
| <b>1) West Europe:</b><br>ANDORRA<br>AUSTRIA<br>BELGIUM<br>DENMARK<br>FAROE ISLANDS<br>FINLAND<br>FRANCE<br>GERMANY<br>GILBRALTAR<br>GRECE<br>GREENLAND<br>HOLY SEE<br>(VATICAN CITY<br>ICELAND<br>IRELAND<br>ITALY<br>JERSEY<br>LIECHTENSTEIN<br>LUXEMBOURG<br>MALTA<br>MONACO<br>NETHERLANDS<br>NORWAY<br>PORTUGAL<br>SAN MARINO<br>SPAIN<br>SVALBARD AND<br>JAN MAYEN<br>SWEDEN<br>SWITZERLAND<br>UNITED KINGDOM | <b>2) Central Europe:</b><br>ALBANIA<br>BOSNIA AND<br>HERZEGOVINA<br>BULGARIA<br>CROATIA<br>CZECH REPUBLIC<br>HUNGARY<br>MACEDONIA, THE<br>FORMER<br>YUGOSLAV<br>REPUBLIC OF<br>POLAND<br>ROMANIA<br>SERBIA AND<br>MONTENEGRO<br>SLOVAKIA<br>SLOVENIA<br>TURKEY | <b>3) East Europe :</b><br>ARMENIA<br>AZERBAIJAN<br>BELARUS<br>ESTONIA<br>GEORGIA<br>KAZAKHSTAN<br>KYRGYZSTAN<br>LATVIA<br>LITHUANIA<br>MOLDOVA,<br>REPUBLIC OF<br>RUSSIAN<br>FEDERATION<br>TAJKISTAN<br>TURKMENISTAN<br>UKRAINE<br>UZBEKISTAN | <b>4) Northern<br/>Africa:</b><br>ALGERIA<br>EGYPT<br>LIBYAN ARAB<br>JAMAHIRIYA<br>MOROCCO<br>SUDAN<br>TUNISIA<br>WESTERN<br>SAHARA | <b>5) Sub Saharan<br/>Africa :</b><br>ANGOLA<br>BENIN<br>BOTSWANA<br>BURKINA FASO<br>BURUNDI<br>CAMEROON<br>CAPE VERDE<br>CENTRAL AFRICAN<br>REPUBLIC<br>CHAD<br>COMOROS<br>CONGO<br>COTE D'IVOIRE<br>DJIBOUTI<br>EQUATORIAL<br>GUINEA<br>ERITREA<br>ETHIOPIA<br>GABON<br>GAMBIA<br>GHANA<br>GUINEA<br>GUINEA-BISSAU<br>KENYA<br>LESOTHO<br>LIBERIA<br>MADAGASCAR<br>MALAWI<br>MALI<br>MAURITIUS<br>MAYOTTE<br>MOZAMBIQUE<br>NAMIBIA<br>NIGER<br>NIGERIA<br>REUNION<br>RWANDA<br>SAINT HELENA<br>SAO TOME and<br>PRINCIPE<br>SENEGAL<br>SEYCHELLES |
|---------------------------------------------------------------------------------------------------------------------------------------------------------------------------------------------------------------------------------------------------------------------------------------------------------------------------------------------------------------------------------------------------------------------|-----------------------------------------------------------------------------------------------------------------------------------------------------------------------------------------------------------------------------------------------------------------|------------------------------------------------------------------------------------------------------------------------------------------------------------------------------------------------------------------------------------------------|-------------------------------------------------------------------------------------------------------------------------------------|----------------------------------------------------------------------------------------------------------------------------------------------------------------------------------------------------------------------------------------------------------------------------------------------------------------------------------------------------------------------------------------------------------------------------------------------------------------------------------------------------------------------------------------------------|

|  |  |  |  |                                                                                                           |
|--|--|--|--|-----------------------------------------------------------------------------------------------------------|
|  |  |  |  | SIERRA LEONE<br>SOMALIA<br>SOUTH AFRICA<br>SWAZILAND<br>TANZANIA,<br>TOGO<br>UGANDA<br>ZAMBIA<br>ZIMBABWE |
|--|--|--|--|-----------------------------------------------------------------------------------------------------------|

|                                                                                                                                                                                                                                       |                                                                                                                                                 |                                                                                                                                                                      |                                                                                                                                                                                                       |
|---------------------------------------------------------------------------------------------------------------------------------------------------------------------------------------------------------------------------------------|-------------------------------------------------------------------------------------------------------------------------------------------------|----------------------------------------------------------------------------------------------------------------------------------------------------------------------|-------------------------------------------------------------------------------------------------------------------------------------------------------------------------------------------------------|
| <b>6) Eastern Mediterranean</b><br>BAHRAIN<br>CYPRUS<br>IRAQ<br>ISRAEL<br>JORDAN<br>KUWAIT<br>LEBANON<br>OMAN<br>PALESTINIAN TERRITORY,<br>OCCUPIED<br>QATAR<br>SAUDI ARABIA<br>SYRIAN ARAB REPUBLIC<br>UNITED ARAB EMIRATES<br>YEMEN | <b>7) South Asia</b><br>AFGHANISTAN<br>BANGLADESH<br>BHUTAN<br>INDIA<br>IRAN, ISLAMIC REPUBLIC OF<br>MALDIVES<br>NEPAL<br>PAKISTAN<br>SRI LANKA | <b>8) East Asia</b><br>CHINA<br>HONG KONG<br>JAPAN<br>KOREA, DEMOCRATIC PEOPLE'S REPUBLIC OF<br>KOREA, REPUBLIC OF<br>MACAO<br>MONGOLIA<br>TAIWAN, PROVINCE OF CHINA | <b>9) South East Asia</b><br>BRUNEI DARUSSALAM<br>CAMBODIA<br>INDONESIA<br>LAO PEOPLE'S DEMOCRATIC REPUBLIC<br>MALAYSIA<br>MYANMAR<br>PHILIPPINES<br>SINGAPORE<br>THAILAND<br>TIMOR-LESTE<br>VIET NAM |
|---------------------------------------------------------------------------------------------------------------------------------------------------------------------------------------------------------------------------------------|-------------------------------------------------------------------------------------------------------------------------------------------------|----------------------------------------------------------------------------------------------------------------------------------------------------------------------|-------------------------------------------------------------------------------------------------------------------------------------------------------------------------------------------------------|

|                                                                                             |                                                                                                                                                                                                                                                                 |                                                                                                                                                                                                                                               |                                                                                                                                                                                                               |
|---------------------------------------------------------------------------------------------|-----------------------------------------------------------------------------------------------------------------------------------------------------------------------------------------------------------------------------------------------------------------|-----------------------------------------------------------------------------------------------------------------------------------------------------------------------------------------------------------------------------------------------|---------------------------------------------------------------------------------------------------------------------------------------------------------------------------------------------------------------|
| <b>10) North America</b><br>BERMUDA<br>CANADA<br>SAINT PIERRE AND MIQUELON<br>UNITED STATES | <b>11) Oceania</b><br>AMERICAN SAMOA<br>AUSTRALIA<br>CHRISTMAS ISLAND<br>COCOS (KEELING) ISLANDS<br>COOK ISLANDS<br>FIJI<br>FRENCH POLYNESIA<br>FRENCH SOUTHERN TERRITORIES<br>GUAM<br>KIRIBATI<br>MARSHALL ISLANDS<br>MICRONESIA,<br>FEDERATED STATES OF NAURU | <b>12) Central Americas and the Caribbean</b><br>ANGUILLA<br>ANTIGUA AND BARBUDA<br>ARUBA<br>BAHAMAS<br>BARBADOS<br>BELIZE<br>BRITISH VIRGIN ISLANDS<br>CAYMAN ISLANDS<br>COSTA RICA<br>CUBA<br>DOMINICA<br>DOMINICAN REPUBLIC<br>EL SALVADOR | <b>13) South Americas</b><br>ARGENTINA<br>BOLIVIA<br>BRAZIL<br>CHILE<br>COLOMBIA<br>ECUADOR<br>FALKLAND ISLANDS (MALVINAS)<br>FRENCH GUIANA<br>GUYANA<br>PARAGUAY<br>PERU<br>SURINAME<br>URUGUAY<br>VENEZUELA |
|---------------------------------------------------------------------------------------------|-----------------------------------------------------------------------------------------------------------------------------------------------------------------------------------------------------------------------------------------------------------------|-----------------------------------------------------------------------------------------------------------------------------------------------------------------------------------------------------------------------------------------------|---------------------------------------------------------------------------------------------------------------------------------------------------------------------------------------------------------------|

|  |                                                                                                                                                                                                                                                                                |                                                                                                                                                                                                                                                                                                                                                      |  |
|--|--------------------------------------------------------------------------------------------------------------------------------------------------------------------------------------------------------------------------------------------------------------------------------|------------------------------------------------------------------------------------------------------------------------------------------------------------------------------------------------------------------------------------------------------------------------------------------------------------------------------------------------------|--|
|  | NEW CALEDONIA<br>NEW ZEALAND<br>NIUE<br>NORFOLK ISLAND<br>NORTHERN MARIANA<br>ISLANDS<br>PALAU<br>PAPUA NEW GUINEA<br>PITCAIRN<br>SAMOA<br>SOLOMON ISLANDS<br>SOUTH GEORGIA AND<br>THE SOUTH SANDWICH<br>ISLANDS<br>TOKELAU<br>TONGA<br>TUVALU<br>VANUATU<br>WALLIS AND FUTUNA | GRENADA<br>GUADELOUPE<br>GUATEMALA<br>HAITI<br>HONDURAS<br>JAMAICA<br>MARTINIQUE<br>MEXICO<br>MONTSERRAT<br>NETHERLANDS<br>ANTILLES<br>NICARAGUA<br>PANAMA<br>PUERTO RICO<br>SAINT KITTS AND<br>NEVIS<br>SAINT LUCIA<br>SAINT VINCENT AND<br>THE GRENADINES<br>TRINIDAD AND TOBAGO<br>TURKS AND CAICOS<br>ISLANDS<br>UNITED STATES VIRGIN<br>ISLANDS |  |
|--|--------------------------------------------------------------------------------------------------------------------------------------------------------------------------------------------------------------------------------------------------------------------------------|------------------------------------------------------------------------------------------------------------------------------------------------------------------------------------------------------------------------------------------------------------------------------------------------------------------------------------------------------|--|
